# Supplementary material for: Arabidopsis LSH8 Positively Regulates ABA Signaling by Changing the Expression Pattern of ABA-Responsive Proteins
Source: MDPI journal article supplement (doi:10.3390/ijms221910314), 2021-09-25
Supplement: s1 [file s1]

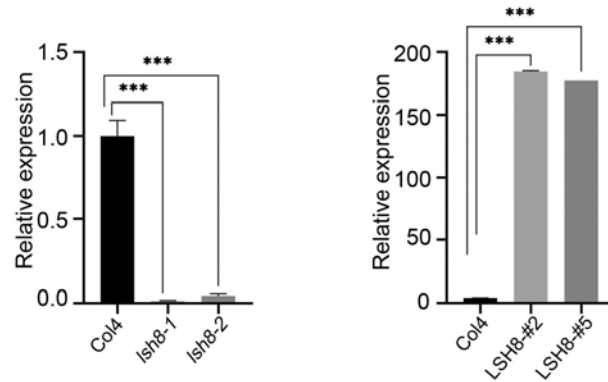

**Figure S1. The expression of *LSH8* in Col4, *lsh8* mutants and LSH8 overexpression plants.** Imbibed seeds were germinated and grown on 1/2 MS medium for 7 d, and then the seedlings were harvested for QPCR. Data are shown as mean  $\pm$  SD (n = 3). *ACT2* was used as the internal control.

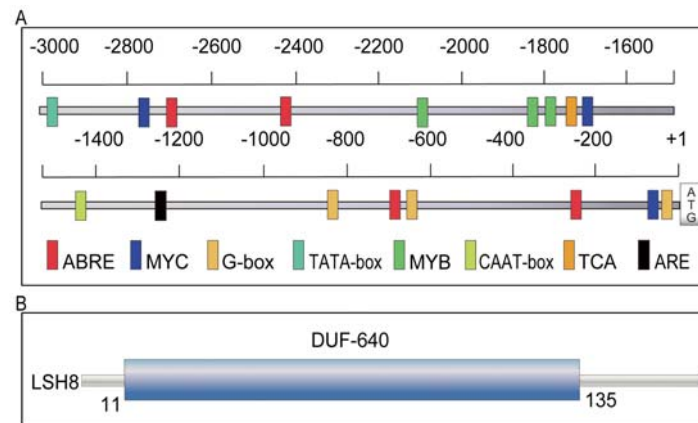

**Figure S2. Analysis of *LSH8* promoter and domain. (A)** The region of 3,000 bp upstream of the *LSH8* gene was analyzed and shown in colored boxes. The colors in the boxes indicate different cis-acting element ABRE (Red); MYC (Blue); G-box (Buff); TATA-box (Bottle green); MYB (Green) ; CAAT-box (Kelly green); TCA (Orange); ARE (Dark). **(B)** The DUF-640 domain of LSH8 is shown in the blue box, and this domain starts at amino acid 11 of LSH8 and ends at amino acid 135.

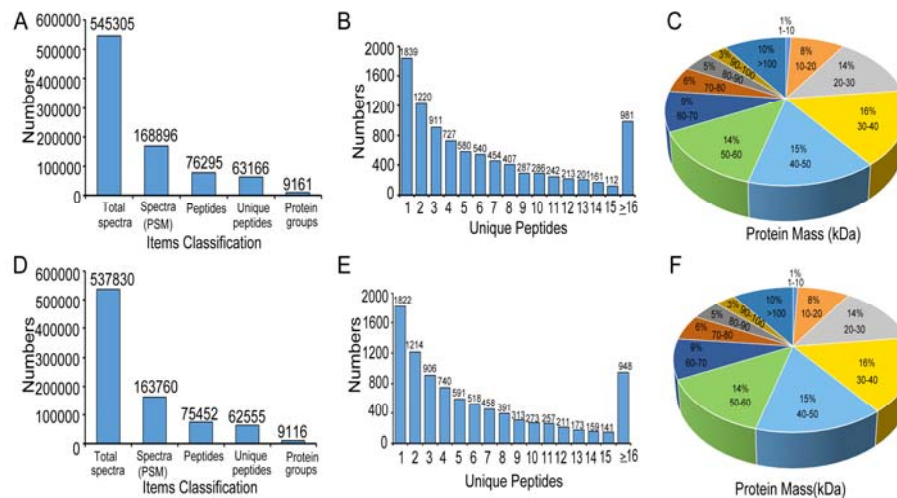

**Figure S3. Results of LC-MS/MS identification in the Col4 and *lsh8* mutant. (A, D)** Classification of the items used for identifying proteins. **(B, E)** The number of unique peptides that matched to each identified

protein. (C, F) Distribution of the average molecular masses of identified proteins.

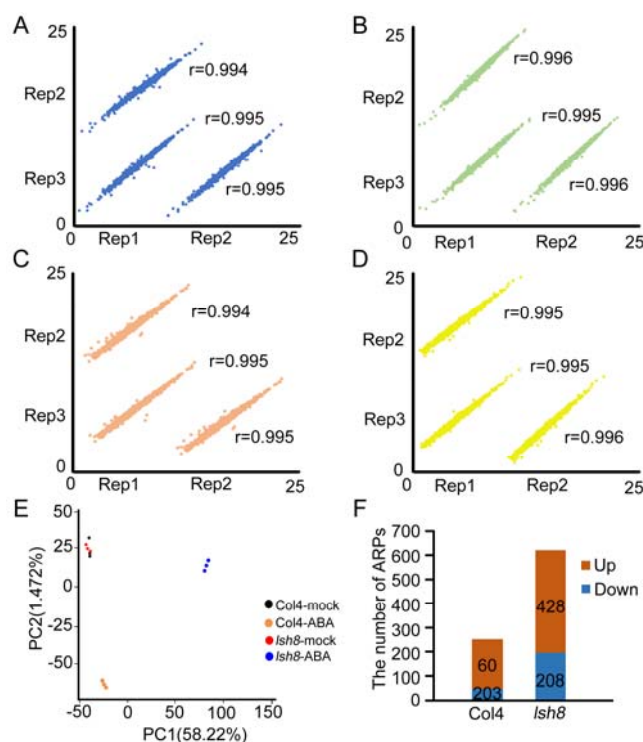

**Figure S4. Sample correlation of proteomic data.** (A-D) The repeatability of the experiment was verified by data correlation analysis among three replicates. *Pearson* correlation coefficient analysis was used, in which “ $r$ ” represents the correlation coefficient between replicates of Col4-mock (A), Col4-ABA (B), *lsh8* mutant-mock (C) and *lsh8* mutant-ABA (D), respectively. (E) Principal component (PCA) analysis. (F) The number of ARPs in Col4 and *lsh8* mutant.

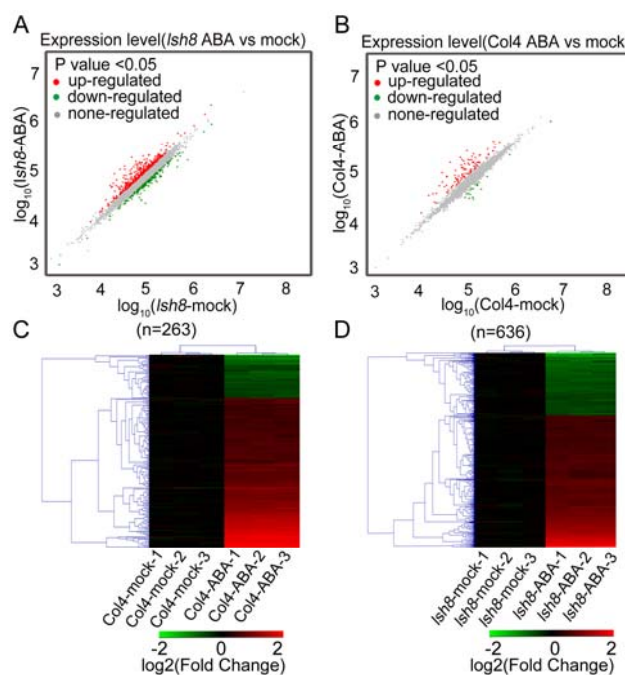

**Figure S5. Summary of the proteomic data.** (A, B) The overall distribution of protein abundance. The red, green and grey dots represent the up-regulated proteins, down-regulated proteins and none-regulated proteins, respectively. (C, D) Heatmap showing the expression of ARPs in Col4 or *lsh8* mutant.

Table S1: Primer used in the study.

Table S2: Basic profiles of proteomics data in wild type Col4.

Table S3: Basic profiles of proteomics data in *lsh8* mutant.

Table S4: Protein change pattern analysis of wild type Col4 under ABA treatment.

Table S5: Protein change pattern analysis of *lsh8* mutant under ABA treatment.
